# Supplementary material
Source: MDPI journal article supplement (https://www.mdpi.com/2073-4395/12/11/2598)
Supplement: s1 [file s1]

Table S1. Primers for qRT-PCR of the differentially expressed *ZmGST* genes

| genes           | Primer sequence (5'-3') |                        |
|-----------------|-------------------------|------------------------|
|                 | Forward primer          | Reverse primer         |
| <i>UPF1</i>     | CACCCGGTTGGCTATGCTGTAC  | TGTGCTCCACCAGAAGGCTGAC |
| <i>ZmGSTU1</i>  | GTAGAGCATCCATCGGTCGG    | TGAACACGAACTGCTCTGCT   |
| <i>ZmGSTU3</i>  | GACACCAAGTTCTCCCAGCC    | CATAGAGCGGGGAACTCGTC   |
| <i>ZmGSTU9</i>  | GACAACAAGTGCTTGAAGCCG   | GCGAAGAACCTCTTCCCCTG   |
| <i>ZmGSTU14</i> | GCCAGGAAGGACTCGTTTGT    | CAGCAGTCCTGACCACTTGT   |
| <i>ZmGSTU22</i> | CGACAAGTTGTTTCCAGCGT    | AGAACAAGAAGGAGCCGAGC   |
| <i>ZmGSTU25</i> | TACATCGACGACAAGATGCTGC  | CCACCGAAGAAGGGCTTCCC   |
| <i>ZmGSTU28</i> | CGACAAGTTCTGCAAGGAGTG   | TCGTCCAGAAGCTTTACGCC   |
| <i>ZmGSTF2</i>  | CGAGCCGTACACAAGAGCTA    | ACGTGATTCTGAAGAGCGTGA  |
| <i>ZmDHAR1</i>  | AGGAGCATCTCAAAGCCAC     | GCTGAACATAGCCTGGGTGT   |

Table S2. List of identified *ZmGST* genes in *Zea mays* along with their detailed genomic and proteomic information.

| Class | Gene name       | Gene ID        | Genomic position          | CDS (bp) | Protein (aa) | Strand | MW (kDa) | pI   |
|-------|-----------------|----------------|---------------------------|----------|--------------|--------|----------|------|
| Phi   | <i>ZmGSTF1</i>  | Zm00001d012675 | Chr08:178411857-178414647 | 645      | 214          | +      | 23.8     | 5.44 |
|       | <i>ZmGSTF2</i>  | Zm00001d024839 | Chr10:90384434-90385822   | 672      | 223          | -      | 24.6     | 5.76 |
|       | <i>ZmGSTF3</i>  | Zm00001d042216 | Chr03:156422305-156423867 | 666      | 221          | +      | 23.9     | 5.96 |
|       | <i>ZmGSTF4</i>  | Zm00001d043344 | Chr03:197152506-197154049 | 675      | 224          | +      | 25.2     | 5.98 |
|       | <i>ZmGSTF5</i>  | Zm00001d048354 | Chr09:154871684-154872915 | 681      | 226          | -      | 25.9     | 8.35 |
|       | <i>ZmGSTF6</i>  | Zm00001d027542 | Chr01:7885525-7886863     | 720      | 239          | -      | 26.6     | 5.96 |
|       | <i>ZmGSTF7</i>  | Zm00001d027539 | Chr01:7844326-7845737     | 918      | 305          | -      | 34.1     | 7.84 |
|       | <i>ZmGSTF8</i>  | Zm00001d027540 | Chr01:7878334-7879915     | 678      | 225          | -      | 25.8     | 7.09 |
|       | <i>ZmGSTF9</i>  | Zm00001d048353 | Chr09:154861537-154862959 | 678      | 225          | -      | 25.7     | 7.75 |
|       | <i>ZmGSTF10</i> | Zm00001d029801 | Chr01:87469723-87475392   | 888      | 295          | -      | 33.1     | 9.39 |
|       | <i>ZmGSTF11</i> | Zm00001d010870 | Chr08:131542385-131544754 | 705      | 234          | -      | 25.6     | 5.30 |
|       | <i>ZmGSTF12</i> | Zm00001d021470 | Chr07:153075349-153079559 | 903      | 300          | -      | 34.6     | 5.97 |
|       | <i>ZmGSTF13</i> | Zm00001d027541 | Chr01:7882159-7883359     | 681      | 226          | -      | 25.8     | 7.09 |
| Tau   | <i>ZmGSTU1</i>  | Zm00001d034356 | Chr01:290470998-290471672 | 675      | 224          | -      | 25.3     | 6.20 |
|       | <i>ZmGSTU2</i>  | Zm00001d018809 | Chr07:5834880-5838491     | 669      | 222          | -      | 25.1     | 5.55 |
|       | <i>ZmGSTU3</i>  | Zm00001d042104 | Chr03:150759060-150760119 | 684      | 227          | -      | 25.2     | 5.29 |
|       | <i>ZmGSTU4</i>  | Zm00001d036951 | Chr06:107194843-107195520 | 678      | 225          | +      | 25.2     | 6.35 |
|       | <i>ZmGSTU5</i>  | Zm00001d043787 | Chr03:210237044-210238359 | 720      | 239          | +      | 26.1     | 5.71 |
|       | <i>ZmGSTU6</i>  | Zm00001d042096 | Chr03:150586826-150587533 | 708      | 235          | -      | 26.5     | 5.25 |
|       | <i>ZmGSTU7</i>  | Zm00001d024963 | Chr10:96969512-96970459   | 699      | 232          | -      | 25.4     | 5.81 |
|       | <i>ZmGSTU8</i>  | Zm00001d020780 | Chr07:132447942-132449006 | 669      | 222          | +      | 24.9     | 6.00 |
|       | <i>ZmGSTU9</i>  | Zm00001d018220 | Chr05:216862591-216863616 | 717      | 238          | -      | 26.5     | 5.36 |
|       | <i>ZmGSTU10</i> | Zm00001d048558 | Chr09:158667068-158667751 | 684      | 227          | -      | 24.8     | 5.33 |
|       | <i>ZmGSTU11</i> | Zm00001d049657 | Chr04:38891516-38892238   | 723      | 240          | -      | 25.8     | 5.38 |
|       | <i>ZmGSTU12</i> | Zm00001d011154 | Chr08:140938753-140939834 | 714      | 237          | +      | 25.2     | 5.39 |
|       | <i>ZmGSTU13</i> | Zm00001d042102 | Chr03:150720597-150721538 | 612      | 203          | +      | 22.5     | 4.93 |
|       | <i>ZmGSTU14</i> | Zm00001d042095 | Chr03:150585101-150586111 | 696      | 231          | +      | 25.7     | 8.25 |
|       | <i>ZmGSTU15</i> | Zm00001d029708 | Chr01:83411025-83411720   | 696      | 231          | +      | 25.2     | 5.33 |
|       | <i>ZmGSTU16</i> | Zm00001d027557 | Chr01:8129042-8130156     | 765      | 254          | -      | 27.8     | 6.60 |
|       | <i>ZmGSTU17</i> | Zm00001d029700 | Chr01:83119704-83120481   | 417      | 138          | +      | 15.1     | 5.10 |
|       | <i>ZmGSTU18</i> | Zm00001d029696 | Chr01:82924832-82926012   | 585      | 194          | -      | 21.1     | 5.62 |
|       | <i>ZmGSTU19</i> | Zm00001d048559 | Chr09:158676251-158677196 | 708      | 235          | -      | 25.6     | 5.37 |
|       | <i>ZmGSTU20</i> | Zm00001d029704 | Chr01:83198362-83199180   | 819      | 272          | +      | 30.2     | 8.81 |
|       | <i>ZmGSTU21</i> | Zm00001d029707 | Chr01:83264283-83265235   | 687      | 228          | +      | 24.9     | 4.90 |
|       | <i>ZmGSTU22</i> | Zm00001d029706 | Chr01:83226938-83228043   | 603      | 200          | -      | 22.1     | 7.55 |
|       | <i>ZmGSTU23</i> | Zm00001d029701 | Chr01:83132970-83133833   | 864      | 287          | +      | 31.4     | 5.59 |
|       | <i>ZmGSTU24</i> | Zm00001d038192 | Chr06:151106706-151108105 | 804      | 267          | -      | 29.0     | 4.85 |
|       | <i>ZmGSTU25</i> | Zm00001d029699 | Chr01:83058555-83059659   | 717      | 238          | +      | 25.7     | 5.11 |
|       | <i>ZmGSTU26</i> | Zm00001d043789 | Chr03:210250790-210261339 | 762      | 253          | +      | 27.3     | 6.12 |
|       | <i>ZmGSTU27</i> | Zm00001d013693 | Chr05:17669086-17669866   | 681      | 226          | +      | 24.3     | 5.71 |
|       | <i>ZmGSTU28</i> | Zm00001d043795 | Chr03:210370495-210371606 | 708      | 235          | +      | 25.7     | 5.87 |

|               |                                  |                |                           |      |     |   |      |      |
|---------------|----------------------------------|----------------|---------------------------|------|-----|---|------|------|
|               | <i>ZmGSTU29</i>                  | Zm00001d042099 | Chr03:150690594-150691502 | 687  | 228 | - | 25.7 | 5.44 |
|               | <i>ZmGSTU30</i>                  | Zm00001d029703 | Chr01:83192078-83193405   | 738  | 245 | + | 26.3 | 4.99 |
|               | <i>ZmGSTU31</i>                  | Zm00001d048560 | Chr09:158683140-158684127 | 726  | 241 | - | 26.6 | 5.74 |
|               | <i>ZmGSTU32</i>                  | Zm00001d042098 | Chr03:150672477-150673522 | 681  | 226 | - | 25.6 | 5.31 |
| Zeta          | <i>ZmGSTZ1</i>                   | Zm00001d016860 | Chr05:178504960-178508727 | 837  | 278 | - | 30.2 | 6.17 |
|               | <i>ZmGSTZ2</i>                   | Zm00001d041772 | Chr03:136996989-137007669 | 891  | 296 | + | 33.5 | 6.45 |
|               | <i>ZmGSTZ3</i>                   | Zm00001d023968 | Chr010:32563929-32567309  | 642  | 213 | - | 23.8 | 5.49 |
| DHAR          | <i>ZmDHAR1</i>                   | Zm00001d037240 | Chr06: 17483616-117495193 | 789  | 262 | - | 28.8 | 6.34 |
|               | <i>ZmDHAR2</i>                   | Zm00001d011035 | Chr08: 37157191-137159528 | 798  | 265 | + | 29.2 | 9.11 |
| TCHQD         | <i>ZmTCHQD1</i>                  | Zm00001d003640 | Chr02:51340087-51353092   | 798  | 265 | + | 31.1 | 8.95 |
| EF1B $\gamma$ | <i>ZmEF1<math>\gamma</math>1</i> | Zm00001d036959 | Chr06:107398589-107403318 | 1236 | 411 | + | 46.7 | 5.86 |
|               | <i>ZmEF1<math>\gamma</math>2</i> | Zm00001d016358 | Chr05:159037923-159041603 | 1245 | 414 | - | 47.0 | 6.31 |
|               | <i>ZmEF1<math>\gamma</math>3</i> | Zm00001d046352 | Chr09:82889286-82893077   | 1254 | 417 | - | 47.3 | 6.08 |
|               | <i>ZmEF1<math>\gamma</math>4</i> | Zm00001d053576 | Chr04:235104770-235108555 | 1314 | 437 | - | 49.5 | 6.44 |

Abbreviations: CDS, coding DNA Sequence; MW, Molecular Weight; pI, Isoelectric point; bp, base pair; aa, amino acid; kDa, kilodalton.
